# Supplementary material for: Posterior Chamber Phakic Intraocular Lenses for the Correction of Myopia: Factors Influencing the Postoperative Refraction
Source: MDPI journal article supplement (doi:10.3390/opt2040028), 2021-12-16
Supplement: s1 [file s1]

Article

# Posterior Chamber Phakic Intraocular Lenses for the Correction of Myopia: Factors Influencing the Postoperative Refraction

Pedro Serra <sup>1,2,\*</sup>, Ángel Sánchez Trancón <sup>2</sup>, Oscar Torrado Sierra <sup>2</sup>, António Baptista <sup>3</sup> and Santiago Cerpa Manito <sup>2</sup>

<sup>1</sup> Cataract and Refractive Surgery Unit, Ophthalmology Clinic Vista Sánchez Trancón, Calle la Violeta, 06010 Badajoz, Spain

<sup>2</sup> Optics and Optometry Department, Instituto Superior de Educação e Ciências, Alameda das Linhas de Torres, 1750-142 Lisboa, Portugal; sancheztrancon@sancheztrancon.com (Á .S.T.); oscar.torrado.sierra@gmail.com (O.T.S.); santicerpa@yahoo.es (S.C.M.)

<sup>3</sup> Center of Physics, Campus de Gualtar, University of Minho, 4710-057 Braga, Portugal; abaptista@fisica.uminho.pt

\* Correspondence: pedro.serra@vistasancheztrancon.com

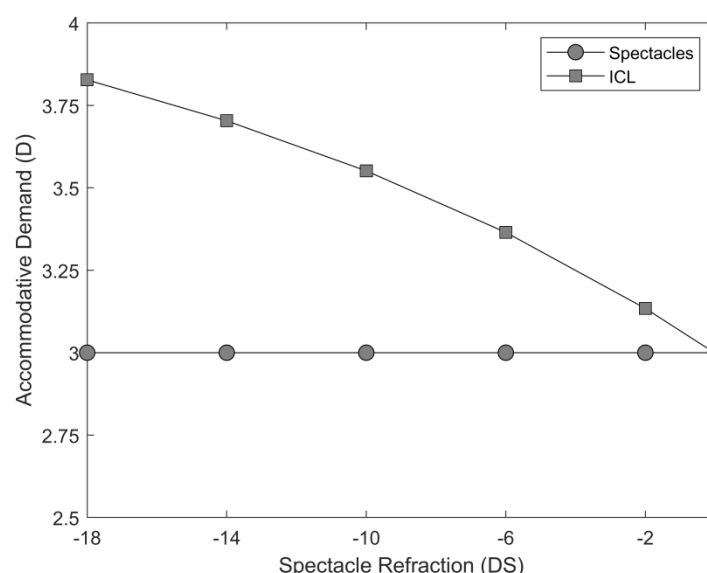

**Figure S1.** Accommodative demand elicited for an object positioned at 0.33 m from the spectacle plane. The accommodative demand remains constant when using spectacles, but increases after implantation of an ICL.
